1 **Comparative analysis of the genomes of *Stylophora pistillata* and**  
2 ***Acropora digitifera* provides evidence for extensive differences between**  
3 **species of corals**

4 Christian R Voolstra<sup>1,\*</sup>, Yong Li<sup>1</sup>, Yi Jin Liew<sup>1</sup>, Sebastian Baumgarten<sup>1+</sup>, Didier  
5 Zoccola<sup>2</sup>, Jean-François Flot<sup>3</sup>, Sylvie Tambutte<sup>2</sup>, Denis Allemand<sup>2</sup>, Manuel Aranda<sup>1,\*</sup>

6 <sup>1</sup>Red Sea Research Center, Division of Biological and Environmental Science and  
7 Engineering (BESE), King Abdullah University of Science and Technology (KAUST),  
8 Thuwal, Saudi Arabia

9 <sup>2</sup>Centre Scientifique de Monaco, 8 quai Antoine Ier, Monaco, 98000, Monaco

10 <sup>3</sup>Université libre de Bruxelles, Avenue Franklin Roosevelt 50, 1050 Bruxelles, Belgium

11 <sup>+</sup>Current address: Biology of Host-Parasite Interactions Unit, Institut Pasteur, 25 rue du  
12 Dr Roux, 75015 Paris, France

13

14 \*Corresponding Authors:

15 christian.voolstra@kaust.edu.sa

16 Tel: +966 12 8082377, Fax: +966 21 8082377

17 manuel.aranda@kaust.edu.sa

18 Tel: +966 12 8082979, Fax: +966 21 8082979

19

20 **Short title:** Extensive differences between coral genomes

21 **Keywords:** Coral Reef, Adaptive Evolution, Genome Sequencing, Scleractinia,  
22 Environmental Change, *Stylophora pistillata*, *Acropora digitifera*

23

24 Stony corals form the foundation of coral reef ecosystems. Their phylogeny is  
25 characterized by a deep evolutionary divergence that separates corals into a robust and  
26 complex clade dating back to at least 245 mya. However, the genomic consequences and  
27 clade-specific evolution remain unexplored. In this study we have produced the genome  
28 of a robust coral, *Stylophora pistillata*, and compared it to the available genome of a  
29 complex coral, *Acropora digitifera*. We conducted a fine-scale gene-based analysis  
30 focusing on ortholog groups. Among the core set of conserved proteins, we found an  
31 emphasis on processes related to the cnidarian-dinoflagellate symbiosis. Similarly, genes  
32 associated with the algal symbiosis were also independently expanded in both species,  
33 but both corals diverged on the identity of ortholog groups expanded, and we found  
34 uneven expansions in genes associated with innate immunity and stress response. Our  
35 analyses demonstrate that coral genomes can be surprisingly disparate. Importantly, if the  
36 patterns elucidated here are representative of differences between corals from the robust  
37 and complex clade, the ability of a coral to respond to climate change may be dependent  
38 on its clade association.

## 39 Introduction

40 Coral reefs are ecologically and economically highly important marine ecosystems, as  
41 they provide biodiversity hotspots for a large diversity of species and serve as a food  
42 source for millions of people<sup>1,2</sup>. Despite their importance, coral reefs are threatened by a  
43 combination of local (e.g., overfishing, eutrophication, pollution) and global (e.g., ocean  
44 warming and ocean acidification) factors that cause an increase of coral disease and coral  
45 bleaching, which in many cases lead to the ultimate death of affected coral colonies<sup>3-5</sup>.  
46 Over the last decades, coral reef cover was significantly decimated and one-third of reef-  
47 building corals face elevated extinction risk from climate change and local impacts<sup>6</sup>. For  
48 this reason, it is important to understand the factors that contribute to ecosystem  
49 resilience.

50 At the heart of these ecosystems are the so-called coral holobionts, which provide the  
51 foundation species of reefs and consist of the coral animal host, its endosymbiotic  
52 photosynthetic algae, and a specific consortium of bacteria (among other organisms)<sup>7,8</sup>.  
53 While recent research highlights the contribution of all holobiont compartments to coral  
54 resilience<sup>9-13</sup>, the majority of studies focus on the diversity of algal and bacterial  
55 symbionts associated with corals or on gene expression of the host under an array of  
56 stressors or across different environments<sup>14-21</sup>. Hence, although coral species display  
57 differing sensitivities to environmental stress<sup>9</sup>, the genomic underpinnings of coral  
58 resilience are not clear.

59 A recent study by Bhattacharya, et al.<sup>22</sup> conducted a comparative analysis incorporating  
60 genomic and transcriptomic data from 20 coral species. Focusing on the orthologs  
61 conserved across all analyzed corals, the authors describe the presence of a variety of  
62 stress-related pathways (e.g., apoptotic pathways, reactive oxygen species scavenging  
63 pathways, etc.) that affect the ability of corals to respond to environmental stress.  
64 Importantly, the authors could show that corals harbor a highly adaptive gene inventory  
65 where important genes arose through horizontal gene transfer or went through rounds of  
66 evolutionary diversification. Similarly, the recently published genome of *Acropora*  
67 *digitifera*<sup>23</sup> highlights that the innate immunity repertoire of corals is presumably and  
68 notably more complex than those of the cnidarians *Nematostella vectensis*<sup>24</sup> and *Hydra*  
69 *magnipapillata*<sup>25</sup>. Seemingly so, the innate immunity repertoire is also more complex  
70 than that of the symbiotic anthozoan sea anemone *Aiptasia*<sup>26</sup>. This has potential  
71 implications for our understanding of coral responses to environmental change.  
72 Unfortunately, it is not straightforward to determine what a ‘typical’ coral genome looks  
73 like. This is because the phylogeny of scleractinian corals is characterized by a deep  
74 evolutionary split that separates corals into a robust and complex clade dating back to at  
75 least 245 mya<sup>27,28</sup>. Hence, several important questions, such as how well the available  
76 genome of *Acropora digitifera* indeed reflects general coral-specific traits and to what  
77 extent species from both coral clades diverged since their separation (giving rise to

78 different adaptations) are currently unanswered due to the dearth of coral genomes. To  
79 this end, the Reef Future Genomics (ReFuGe) 2020 consortium has formed to sequence  
80 10 hologenomes of coral species representing different stress susceptibilities in order to  
81 better understand conserved and lineage-specific traits, but a comprehensive analysis is  
82 pending<sup>9</sup>.

83 In this study, we produced and analyzed the genome of *Stylophora pistillata*, a  
84 representative of the robust clade of corals, and compared it to the available genome of  
85 the complex coral *A. digitifera*. We were specifically interested in a comparison of (1) the  
86 set of orthologous genes, (2) species-specific genes, and (3) genes that were  
87 independently expanded in either of the genomes or both. These three classes of genes,  
88 we reasoned, provide complementary insight into the evolutionary history of both corals,  
89 and may highlight important species-specific adaptive processes<sup>29,30</sup>. Further, such a  
90 comparative analysis may pinpoint genomic differences that arose from the different  
91 evolutionary trajectories that occurred in coral species from either clade and, as such,  
92 may represent clade-specific differences.

## 93 Results

### 94 Genome size and genic composition

95 We assembled 400 Mb of the genome of the coral *S. pistillata* (Table 1, Fig. S1) with a  
96 scaffold N50 of 457 kb, representing ~92% of the 434 Mb genome as estimated via  
97 FACS (Fig. S2). 358Mb were assembled into contigs, with a contig N50 of about 24 kb  
98 (Table 1, Table S1). We identified 25,769 protein-coding genes encoded in the *S.*  
99 *pistillata* genome, of which 89% retrieved functional annotation from protein databases  
100 (Table 1, Table S2). The genome size and the number of genes are comparable to the  
101 draft genome of *A. digitifera* that features a total scaffold length of about 419 Mb with a  
102 scaffold N50 of 191 kb and 23,523 protein-coding genes (Table 1). However, genome  
103 completeness as assessed by CEGMA<sup>31</sup> was considerably higher in *S. pistillata* with  
104 about 94.76% of the core eukaryotic genes present compared to 82.26% in *A. digitifera*  
105 (Table S3).

106 To obtain general insight into the genic composition of coral genomes, we performed a  
107 BLASTP search with the gene sets encoded in both genomes against the ‘nr’ protein  
108 database (see Materials & Methods). The vast majority of genes from both species had  
109 best matches to *Aiptasia* (48.36% for *S. pistillata* vs. 43.82% for *A. digitifera*) and  
110 *Nematostella* (23.54% for *S. pistillata* vs. 25.82% *A. digitifera*) (Fig. 1a). The remaining  
111 genes generally matched non-cnidarian proteins or had no matches (7.30% *S. pistillata* vs.  
112 10.55% for *A. digitifera*), presumably representing lineage-specific or species-specific  
113 genes. Strikingly, when this analysis was extended to allow for inter-coral matching,  
114 pronounced differences were revealed between both coral species (Fig. 1b). In particular,  
115 we found that matches of *A. digitifera* genes to *S. pistillata* genes were highly  
116 disproportional (17,866 *A. digitifera* genes matched to 10,945 *S. pistillata* genes,  $p < 10^{-300}$ ,  
117 Fisher’s exact test), indicating potential pervasive gene duplication in *A. digitifera*. In  
118 addition, *A. digitifera* exhibited significantly fewer matches to the anemones *Aiptasia*  
119 (1,942 genes) and *Nematostella* (1,011 genes) than *S. pistillata* (6,994 gene matches to  
120 *Aiptasia*, 3,437 gene matches to *Nematostella*) (Fisher’s exact test,  $p < 10^{-300}$  and  $p < 10^{-283}$ ,  
121 respectively), pointing towards increased divergence of protein sequences in *A.*  
122 *digitifera*.

### 123 Conservation of protein-encoding genes

124 We first compared the genomes at the protein level, considering 25,769 *Stylophora* and  
125 23,523 *Acropora* protein-encoding genes. The proteins were classified into four  
126 categories according to their evolutionary relationships (Fig. 2). The first category  
127 includes *Stylophora* proteins with one clearly identifiable counterpart in *Acropora* and  
128 *vice versa* (one-to-one orthologs). The function of these proteins is likely conserved and  
129 can be interrogated to infer core functions of coral genomes. This approach was

130 employed in a recent study<sup>22</sup>, where the authors collated and queried data from 20 coral  
131 species (including *S. pistillata* and *A. digitifera*) to elucidate four major issues in coral  
132 evolution, i.e. coral calcification, environmental sensing, symbiosis machinery, and the  
133 role of horizontal gene transfer (HGT). Here, we used reciprocal best matches that  
134 produced 6,302 protein pairs classified as one-to-one orthologs (24% of *S. pistillata* and  
135 27% of *A. digitifera* proteins) (Supplementary Dataset S1). The second category included  
136 proteins in which gene duplication has occurred in one or both species after divergence,  
137 resulting in “many-to-one” and “many-to-many” ortholog relationships, respectively.  
138 This group consisted of 2,747 *S. pistillata* and 2,900 *A. digitifera* proteins (11% of *S.*  
139 *pistillata* and 12% of *A. digitifera* proteins) that presumably harbor genes that expanded  
140 independently in both lineages (Supplementary Dataset S2). We hypothesize that the  
141 presence of species-specific gene expansions likely reflects functions relevant to either  
142 species- or clade-specific evolution. The third category included 15,442 *S. pistillata* and  
143 12,925 *A. digitifera* proteins (60% and 56%, respectively) that have homologs in corals or  
144 other species, but without easily discernable orthologous relationships between corals.  
145 The high number of this group of proteins likely also reflects our conservative approach  
146 for ortholog identification (see Materials & Methods). Finally, the fourth group consisted  
147 of 1,278 *Stylophora* and 1,396 *Acropora* proteins that have no detectable homologs in  
148 any other species. These proteins putatively belong to the class of taxonomically  
149 restricted genes (TRGs) that might be encoded by lineage-specific or fast evolving genes  
150<sup>29</sup>.

### 151 **The core set of conserved proteins highlight processes relevant to coral evolution**

152 The average sequence identity of the one-to-one orthologs of *S. pistillata* and *A. digitifera*,  
153 which are presumably at least ~245 mya apart<sup>27</sup> was 62% on the protein level. By  
154 comparison, average sequence identity between *Anopheles* and *Drosophila*, which are  
155 separated by approximately the same time<sup>32</sup> was estimated to be 56% in a previous study  
156<sup>30</sup>. This indicates that despite the comparable divergence time in both comparisons, coral  
157 proteins diverge at a lower rate than insect proteins, possibly because corals have much  
158 longer generation times<sup>9</sup>, although a substantial portion of the genome can evolve at  
159 elevated rates<sup>33</sup>. At the same time, the average sequence identity between orthologs  
160 shared by humans and pufferfish is 61%, and these species are approximately 450 million  
161 years apart<sup>34</sup>, indicating that corals are not at the lowest end of divergence rates.

162 The one-to-one orthologs constitute a core of conserved functions that encode for basic  
163 biological processes, which is corroborated by a Gene Ontology (GO) based analysis  
164 (Supplementary Dataset S3). The 50 most common GO terms are associated with  
165 regulation of metabolism and cellular processes, organelle function, and notably,  
166 nitrogen-related metabolic processes, the regulation of which were previously discussed  
167 as central to coral holobiont functioning<sup>35</sup>.

168 To test whether ortholog groups across a range of sequence similarities were enriched for  
169 certain biological processes, we divided the set of one-to-one orthologs into three groups:  
170 orthologs displaying  $\geq 50\%$ , between  $< 50\%$  and  $\geq 30\%$ , and those displaying  $< 30\%$   
171 sequence similarity and tested for Gene Ontology enrichment (Supplementary Dataset  
172 S4). The group of highly conserved orthologs was, as expected, enriched for genes  
173 associated with housekeeping processes, such as transcription, translation, and ribosomes.  
174 In comparison, the group displaying similarity between 50% and 30% were enriched for  
175 orthologs associated with endocytosis, immune system activation (NFkB), and  
176 superoxide metabolic processes, which putatively play a role in the endosymbiosis. In  
177 contrast, the group of orthologs with similarity  $< 30\%$  was enriched for processes playing  
178 a role in cell adhesion, cell junctions, and calcium ion binding. In this regard, it is  
179 interesting to note that a recent study <sup>36</sup> found an unexpected diversity of structural  
180 components of septate junctions in cnidarians and suggested that genes involved in the  
181 formation of septate junctions may determine coral resistance to ocean acidification.

### 182 **Gene expansions and reductions point to a set of common and species-specific** 183 **processes related to cnidarian-dinoflagellate endosymbiosis**

184 A functional enrichment analysis using Gene Ontology information highlighted several  
185 biological processes that were enriched in the category of orthologs with “many-to-one”  
186 and “many-to-many” relationships, and several of these processes were shared between  
187 both coral species, although the majority of enriched processes were species-specific  
188 (Supplementary Dataset S5). The common processes included several immunity-related  
189 GO categories associated with the regulation of NFkB and in particular interferon  
190 production, but also categories related to cell adhesion and bicarbonate transport.  
191 Arguably, all these processes are related to the cnidarian-dinoflagellate endosymbiosis.  
192 Immunity-related GO terms were also present in the enriched categories specific to *S.*  
193 *pistillata*, but other GO terms prevailed. For instance, several processes related to  
194 receptor-mediated endocytosis, amine metabolism, osmosis, apoptosis, and hyperoxia  
195 were enriched. Again, these processes are conceivably related to the symbiotic  
196 relationship with zooxanthellae. In *A. digitifera* we also found enrichment of processes  
197 related to innate immunity, in particular of genes associated with the Toll signaling  
198 pathway, interleukin production, and bacterial detection. Other enriched processes  
199 specific to *A. digitifera* were notably different however, such as miRNA metabolism,  
200 cytoskeletal organization, hydrogen peroxide metabolism, proteolysis, and pyroptosis.

### 201 **Uneven expansions of proteins related to the immune system**

202 The group of proteins with gene duplications in one or both species revealed many  
203 uneven expansions (or reductions) as highlighted by the observation that in many cases a  
204 single protein in either species had multiple counterparts in the other species. Genes  
205 experiencing multiple rounds of duplications in either one or both species are arguably

206 among the most interesting proteins to look at, as they may reveal information on  
207 processes independently selected in either or both species. For this reason, we further  
208 looked into ortholog groups with at least 3 proteins in either one or both corals.

209 Both coral species expanded genes related to innate immunity receptors. For instance, we  
210 discovered 3 cases where a gene encoding for a NOD-like receptor family member  
211 (NLRC3) was independently expanded in both corals (Supplementary Dataset S6).  
212 Further, we found 1 case where a gene encoding for a TLR (Toll-like receptor 1), and  
213 another case where a gene encoding for a TNFR (Tumor necrosis factor receptor  
214 superfamily member 1) showed independent duplication in both corals (Supplementary  
215 Dataset S6). Importantly, the ortholog groups showed different degrees of expansions in  
216 both corals. In three of the above cases, we found more duplicated genes in *A. digitifera*  
217 than in *S. pistillata*. In contrast, in only one of the above cases we found more genes in *S.*  
218 *pistillata* than *A. digitifera* (Supplementary Dataset S6). We found an extreme case of  
219 expansion for one of the NOD-like receptor family members, where *A. digitifera*  
220 harbored 52 proteins in comparison to *S. pistillata* that harbored only 5 proteins (Fig. 3,  
221 Supplementary Dataset S6). Overall, *A. digitifera* had a stronger tendency to show  
222 ‘extreme’ expansions (10 ortholog groups with more than 10 proteins) than *S. pistillata* (3  
223 ortholog groups with more than 10 proteins) (Supplementary Dataset S6). Besides innate  
224 immunity receptors, we also found 2 ortholog groups related to biomineralization, i.e.  
225 homologs of Carbonic Anhydrase (CA) and Bone Morphogenetic Protein 1 (BMP-1), to  
226 be expanded in both species, but at very similar levels (3 vs. 4 proteins for CA and 3  
227 proteins each for BMP-1 for *A. digitifera* and *S. pistillata*, respectively) (Supplementary  
228 Dataset S6).

229 For the groups of proteins with gene duplications in only of the coral species  
230 (Supplementary Dataset S7), we identified 167 genes in *S. pistillata* that mapped to  
231 groups of three or more genes in *A. digitifera*. Most notably, a member of the NOD-like  
232 receptor family member (NLRC3) gave rise to 55 genes in *A. digitifera* with 1  
233 counterpart in *S. pistillata* (Fig. 3). Similarly, 191 genes from *A. digitifera* mapped to  
234 groups of 3 or more genes in *S. pistillata*. Among these, we found homologs of innate  
235 immunity related proteins, namely TRAFs (TNF receptor-associated factor 3) (Fig. 3) and  
236 TLRs (Toll-like receptor 2) to be present with 3 copies, and a homolog of peroxidase,  
237 important for oxidation-reduction, to be present with 5 copies in *S. pistillata*.



## 238 Discussion

239 The inference of evolutionary relationships within the Scleractinia is an ongoing subject  
240 of debate, complicated by the phenotypic plasticity in skeletal growth forms and unusual  
241 slow mitochondrial DNA sequence evolution<sup>37,38</sup>. Nevertheless, a major distinction into  
242 two clades ("complex" and "robust" corals) within the Scleractinia dating back to about  
243 245 mya<sup>27</sup> is corroborated by molecular analyses<sup>37,39,40</sup>. In line with this estimate,  
244 scleractinian corals first appeared in the fossil record about 245 mya<sup>41</sup>. However, the  
245 genomic consequences of this deep divergence remain unexplored. In this study we have  
246 assembled the genome of the robust coral *S. pistillata* and compared it to the available  
247 genome of the complex coral *A. digitifera* to gain a first look at coral species differences  
248 from both clades on a genomic scale.

249 To thoroughly understand the extent of conservation at the protein level, we followed an  
250 ortholog-based approach where we assigned proteins into four categories according to  
251 their evolutionary relationships: (i) one-to-one orthologs, (ii) many-to-one and many-to-  
252 many orthologs, (iii) proteins without easily discernible orthologous relationships, and  
253 (iv) species-specific proteins without homologs in other species. Notably more than half  
254 of the proteins from both species could not be assigned clear orthologous relationships,  
255 putatively indicating the substantial divergence associated with the deep evolutionary  
256 split between both corals. This is further corroborated by the genic composition results,  
257 which shows that more than two thirds of proteins in both species match to homologs in  
258 other cnidarian species (*Aiptasia* and *N. vectensis*).

259 Of the remaining other half of proteins from the ortholog-based analysis, about two thirds  
260 of the proteins (6,302 protein pairs) displayed clear one-to-one relationships, which can  
261 be considered core proteome members. This number closely resembles the number of  
262 one-to-one orthologs identified by Debashish *et al.*<sup>22</sup> in a large metaanalysis of available  
263 coral genomes and transcriptomes (4,751 ortholog pairs). Within the set of conserved  
264 orthologs across corals, the authors characterized sets of proteins responsible for  
265 biomineralization, environmental sensing, and response to temperature, light, and pH.  
266 Our analysis of enriched GO terms largely supports the results of the study by Debashish  
267 *et al.*<sup>22</sup> and further highlights the overarching emphasis on processes related to the  
268 cnidarian-dinoflagellate symbiosis in the coral host core set of conserved proteins.

269 A particular interesting category of orthologs is comprised of those with many-to-one and  
270 many-to-many relationships. Family expansion and reduction can be measured in  
271 different ways. The most basic measure is to annotate proteins to their domains and  
272 compare the normalized domain count between genomes. Although this is  
273 straightforward way to assess overall similarities and differences between genomes, it  
274 does not provide information on relatedness of proteins with the same domains/domain  
275 compositions. A better resolution is provided by an analysis of the enriched functions of

276 the many-to-one and many-to-many orthologs. About 10% of proteins from both  
277 genomes fall into this category. Although this group is less strictly defined than the group  
278 of one-to-one orthologs, they can still be assigned to a single ancestral gene, and hence,  
279 imply duplication within the species, i.e. after both species diverged. As such, analysis of  
280 these proteins allows inferences on adaptations, e.g. to different environments or life  
281 strategies. Following this reasoning, we interrogated the group of orthologs with “many-  
282 to-one” and “many-to-many” relationships in order to determine similarities and  
283 differences in evolutionary trajectories for the two coral species under investigation, as  
284 differentiation in function are suggested by increases and decreases in gene family sizes.

285 This analysis revealed several striking features. First, among the shared enriched  
286 processes for this category of orthologs, we found many processes directly related to the  
287 cnidarian-dinoflagellate symbiosis. This partially resembles the results from the one-to-  
288 one ortholog analysis with the important difference that independent expansions of genes  
289 that map to common processes indicate that cnidarian-dinoflagellate symbioses are  
290 actively being shaped within coral species and that different hosts seem to converge on  
291 the same processes, indicating convergent evolution. Second, within these processes,  
292 homologs of the same or similar genes are repeatedly being expanded across species, as  
293 highlighted by the example of three cases of expansion of NLRC3. This indicates that the  
294 same genes are potentially subjected to adaptation within and between coral species,  
295 arguing that convergent evolution not only happens on the process level, but also on the  
296 protein level. Further evolutionary analysis incorporating more species might provide an  
297 avenue to identify genes important to coral host adaptation. Last, even though we find  
298 expansions of the same genes between species, the extent of duplication is in some cases  
299 extremely uneven.

300 In particular when considering ortholog groups that play a role in innate immunity, the  
301 emerging pattern is that both coral species independently expanded ortholog groups  
302 belonging to TLRs, TNFRs, and NLRs. This resembles the analysis of Shinzato, et al.<sup>23</sup>  
303 that found that the *A. digitifera* repertoire of Toll/TLR-related receptors was substantially  
304 more complex and diverse than that of *Nematostella* and is further in line with the  
305 extensive expansion of NLRs in the coral as reported by Hamada, et al.<sup>42</sup>. Also, our  
306 results are in line with Baumgarten *et al.*<sup>26</sup> and Poole and Weis<sup>43</sup> who found that the  
307 TLR/ILR protein repertoires of the symbiotic sea anemone *Aiptasia* show close similarity  
308 to *N. vectensis* with apparently lineage-specific expansion in *A. digitifera*. From the  
309 admittedly limited analysis of two coral genomes, it appears, however, that *A. digitifera*  
310 shows a more pronounced tendency to duplicate genes in the ortholog groups that are  
311 expanded in both corals (many-to-many) (Supplementary Dataset S6). This pattern was  
312 also apparent when considering innate immunity-related ortholog groups that are  
313 expanded in only one of both corals (“many-to-one”) (although expansions were similar  
314 when considering all ortholog groups) (Supplementary Dataset S7). Hence, it will be

315 interesting to see whether *A. digitifera* (and perhaps other *Acropora* species) represent  
316 indeed ‘extreme’ cases of expansion of innate immunity-related genes (even within  
317 corals) and whether this might even be a hallmark of coral species from the complex  
318 clade. With more coral genomes expected to becoming available soon<sup>9</sup>, this would be a  
319 fascinating question to pursue. But the analysis of “many-to-one” ortholog groups also  
320 revealed that *A. digitifera* and *S. pistillata* seem to diverge on which innate immunity-  
321 related genes are expanded. In *A. digitifera* we find NLRs, whereas in *S. pistillata* we find  
322 TLRs and TRAFs to be preferentially expanded. Thus, it will be interesting to determine,  
323 whether these evolutionary differences might help to pinpoint groups of genes or  
324 individual proteins that determine differential specificity to algal symbionts or can be  
325 related to differences in physiology, such as thermal tolerance, stress resilience, symbiont  
326 transmission mode, and others<sup>9</sup>.

327 Taken together, our analyses corroborate recent comparative genomic analyses that  
328 showcase how the proteomic information stored in coral genomes has provided the  
329 foundation for adapting to a symbiotic, sessile, and calcifying lifestyle of scleractinian  
330 corals<sup>22,23,44</sup>. In particular, our analyses of the core set of conserved proteins and the set  
331 of independently expanded ortholog groups in both species underscore the putative  
332 importance of the endosymbiotic relationship in determining evolutionary patterns. At the  
333 same time, our results demonstrate that coral genomes can be surprisingly disparate as  
334 highlighted by extremely uneven or independent expansions of some ortholog groups. It  
335 will be important to determine whether the patterns describe here extend to differences  
336 between clades and, most importantly, if they are predictive and relevant to a coral’s  
337 ability to respond to environmental change.

338

## 339 **Methods**

### 340 **Organism and isolation of genomic DNA**

341 Colonies of *S. pistillata*, collected at a depth of 5m in front of the Marine Science Station,  
342 Gulf of Aqaba, Jordan <sup>45</sup>, were transferred and maintained at the Centre Scientifique de  
343 Monaco in aquaria supplied with flowing seawater from the Mediterranean Sea  
344 (exchange rate: 2% h<sup>-1</sup>) at a salinity of 38.2 PPT, pH 8.1 ± 0.1 under an irradiance of 300  
345 μmol photons m<sup>-2</sup> s<sup>-1</sup> at 25 ± 0.5 °C. Corals were fed three times a week with frozen krill  
346 and live *Artemia salina* larvae. Based on nuclear ITS and mitochondrial COI, coral  
347 colonies were typed to be *S. pistillata* clade 4, which is found throughout the northwest  
348 Indian Ocean including the Red Sea, the Persian/Arabian Gulf and Kenya <sup>46</sup> (Fig. S1).  
349 DNA for sequencing libraries was extracted from *S. pistillata* nubbins using a nuclei  
350 isolation approach to minimize contamination with algal symbiont DNA. Briefly, cells  
351 from a *S. pistillata* nubbin of about 3 cm were harvested in 50 ml of 0.2 M EDTA  
352 solution using a water pick and refrigerated at 4 °C. Extracts were first passed through a  
353 100 μm and subsequently through a 40 μm cell strainer (Falcon, Corning, Tewksbury  
354 MA, USA) to eliminate most of the zooxanthellae. Next, extracts were centrifuged at  
355 2,000 g for 10 min at 4 °C. The supernatant was discarded and the resulting pellets were  
356 homogenized in lysis buffer (G2) of the Qiagen Genomic DNA isolation kit (Qiagen,  
357 Hilden, Germany). DNA was extracted following manufacturer's instructions using  
358 genomic-tip 100/G. DNA concentration was determined by O.D. with Epoch Microplate  
359 Spectrophotometer (BioTek, Winooski, VT, USA). A check for potential co-isolation of  
360 *Symbiodinium* DNA was assessed via PCR targeting the multicopy gene RuBisCO  
361 (Genbank accession number AY996050) and did not yield any amplification.

### 362 **Genome size estimation**

363 To assess genome size and validate the bioinformatically estimated genome size, we  
364 performed a physical measurement of nuclei DNA content using chicken red blood cells  
365 (CRBC) as a reference (DNA QC Particles kit, BD Biosciences, San Jose, CA, USA).  
366 Extraction and staining of nuclei were performed following the 'CyStain PI absolute T'  
367 kit (PARTEC #05-5023, Partec, Muenster, Germany) following the manufacturer's  
368 recommendation. Briefly, cells from *S. pistillata* from a nubbin of about 3 cm were  
369 harvested using a Water Pick in 50 ml of 0.2 M EDTA solution refrigerated at 4 °C and  
370 centrifuged at 2,000 g for 10 min at 4 °C. The cell pellet was resuspended in nuclei  
371 extraction buffer, incubated for 15 min at 22 °C and subsequently filtered through a 40  
372 μm cell strainer. Cell lysates were stained with propidium iodide for 60 min at 22 °C,  
373 protected from light. Fluorescence signals from nuclear suspensions of separate (i.e., *S.*  
374 *pistillata* or CRBC) and mixed nuclei (i.e., *S. pistillata* and CRBC) were measured on a  
375 LSRII Fortessa (BD Biosciences, San Jose, CA, USA) using a 561 nm laser and

376 BP605/40 filter. Based on the known diploid DNA content of chicken erythrocytes of  
377 2.33 pg per cell), coral genome size calculation was determined as follows: sample  
378 genome size [pg] =  $1.165 \times x / y$  (x: fluorescence intensity of your unknown sample; y:  
379 fluorescence intensity of CRBC). After calculating mean DNA content per copy of  
380 genetic information (1C), genome size can be determined by considering that 1 pg DNA  
381 equals 978 Mb. The measurements yielded an estimated *Stylophora pistillata* haploid  
382 genome size of 434 Mb (Fig. S2).

### 383 **Genome sequencing and assembly**

384 Sequencing libraries were prepared using the Illumina TruSeq DNA kits for paired-end or  
385 mate-pair libraries respectively according to the manufacturer's instructions. A total of 5  
386 paired-end and 8 mate-pair libraries were generated and sequenced on the Illumina HiSeq  
387 platform at the KAUST Bioscience Core Facility with exception of the library "miseq",  
388 which was sequenced on the Illumina MiSeq platform (Table S4). An additional mate-  
389 pair library (mp05) was generated and sequenced at GATC Biotech (Konstanz, Germany)  
390 (Table S4). All data were uploaded to NCBI and are available under Bioproject ID  
391 PRJNA281535 (<https://www.ncbi.nlm.nih.gov/bioproject/PRJNA281535/>).

392 All sequencing libraries (435x coverage) were trimmed using Trimmomatic version 0.32  
393 <sup>47</sup> to remove adaptors, primers, and low quality bases at the ends of sequence reads.  
394 Putative PCR duplicates were removed using FastUniq version 1.1 <sup>48</sup> to compact the  
395 dataset for higher assembly performance. Three-pass digital normalization was performed  
396 on all paired-end libraries to reduce data redundancy with khmer <sup>49</sup> version 0.7.1 (k=20  
397 C=20, then k=20 C=10). Four paired-end libraries (221x coverage) and four mate-pair  
398 libraries (96x coverage) were *de novo* assembled with ALLPATHS-LG release 48961 <sup>50</sup>  
399 using parameter HAPLOIDIFY=True, and transcriptome data was used to scaffold the  
400 assembly with L\_RNA\_Scaffolder <sup>51</sup>. All Illumina sequencing libraries were used for  
401 scaffolding and gap filling using SSPACE version 1.2 <sup>52</sup> and GapFiller version 1.11 <sup>53</sup>  
402 iteratively for 3 rounds. The above-described procedure yielded an assembly of  
403 358,078,850 bp total contig size and 400,108,361 bp total scaffold size with respective  
404 N50s of 24,388 bp and 457,453 bp. Basic genome statistics for contigs and scaffolds were  
405 generated using the perl script  
406 ([http://korflab.ucdavis.edu/datasets/Assemblathon/Assemblathon2/Basic\\_metrics/assemblathon\\_stats.pl](http://korflab.ucdavis.edu/datasets/Assemblathon/Assemblathon2/Basic_metrics/assemblathon_stats.pl))  
407 used to validate assemblies in the "Assemblathon 2 Contest" <sup>54</sup>. The  
408 estimated genome size as per ALLPATHS-LG was reported at 433 Mb, and the  
409 assembled contig and scaffold lengths provide a genome coverage of ~83% and 92%,  
410 respectively. Further information regarding genome statistics are provided in Table 1 and  
411 Table S1.

412

#### 413 **Identification and removal of contaminating sequences**

414 To identify and remove sequences likely to have originated from dinoflagellate, bacterial,  
415 or viral contaminants, a custom script was written employing the following strategy.  
416 BLASTN searches were conducted against six databases: the genomes of *S. minutum*<sup>55</sup>  
417 and *S. microadriaticum*<sup>56</sup>; complete bacterial genomes  
418 (<ftp://ftp.ncbi.nih.gov/genomes/Bacteria/all.fna.tar.gz>), draft bacterial genomes  
419 ([ftp://ftp.ncbi.nih.gov/genomes/Bacteria\\_DRAFT/](ftp://ftp.ncbi.nih.gov/genomes/Bacteria_DRAFT/)), and complete viral genomes  
420 (<ftp://ftp.ncbi.nih.gov/genomes/Viruses/all.fna.tar.gz>) databases from NCBI; and the viral  
421 database PhAnToMe (<http://phantome.org>). All databases were retrieved in July 2014. As  
422 the lengths of the query and hit sequences were up to hundreds of kilobases, a  
423 combination of cutoffs (total bit score > 1,000, e-value ≤ 10<sup>-20</sup>) was used to identify  
424 scaffolds with significant sequence similarities to non-coral sequences representing  
425 potential contaminants. This procedure yielded 41 scaffolds that displayed significant  
426 similarity in over 50% of their non-N sequences, and thus were considered to have  
427 originated from bacterial contaminants and removed from the final assembly.

428

#### 429 **Annotation of repetitive elements**

430 *De novo* identification of species-specific repeat regions in the genome assembly of *S.*  
431 *pistillata* was performed using RepeatScout (version 1.0.5)<sup>57</sup> with an l-mer size of l = 16  
432 bp. Using the default settings, 10,224 distinct repeat motifs were identified that occurred  
433 ≥10 times. Annotation of these repeats was performed as described previously<sup>26</sup> using  
434 three different methods: (i) RepeatMasker (version 4.0.2)<sup>58</sup> using RepBase version 19.07,  
435 (ii) TBLASTX against RepBase version 19.07, and (iii) BLASTX against a custom-made  
436 non-redundant database of proteins encoded by transposable elements (TEs; NCBI  
437 keywords: retrotransposon, transposase, reverse transcriptase, gypsy, copia). The best  
438 annotation among the three methods was chosen based on alignment coverage and score.  
439 The repeat motifs identified in this way and the set of known eukaryotic TEs from  
440 RepBase (May 2014 release) were then used to locate and annotate the repeat elements in  
441 the assembled genome using RepeatMasker (version 4.0.2). The repeat identification and  
442 annotation for the *A. digitifera* genome assembly was performed *sensu* Baumgarten, et al.  
443<sup>26</sup> (Table S5).

#### 444 **Reference transcriptome sequencing and assembly**

445 Total RNA was extracted from *S. pistillata* nubbins subjected to different pH treatments.  
446 Briefly, nubbins were cultured in triplicates at pH 7.2, 7.6, 7.8, and 8.1 for 24 months  
447 prior to extraction. The RNA preparation was performed as described in Liew, et al.<sup>59</sup>  
448 and strand-specific sequencing libraries were generated using the NEBNext Ultra  
449 Directional RNA Library Prep Kit for Illumina (NEB, Ipswich, MA, USA). A total of 12  
450 libraries were generated and sequenced on 2 lanes of the Illumina HiSeq platform at the  
451 KAUST Bioscience Core Facility (KAUST, Thuwal, KSA), producing 924 million read

452 pairs with 900x coverage. Sequence reads from all libraries were trimmed using  
453 Trimmomatic version 0.32 to remove adaptors, primers, and low quality read ends (base  
454 quality < 30). Further, all reads shorter than 35 bp were removed. PhiX reads were  
455 removed using Bowtie2<sup>60</sup> and putative PCR duplicates were removed with PRINSEQ-  
456 lite version 0.20.3<sup>61</sup>. After that, all libraries were merged and error correction was carried  
457 out using ErrorCorrectReads.pl (ALLPATHS-LG). The resulting merged library was  
458 assembled *de novo* using Trinity<sup>62</sup> release 20140413 with strand-specific parameter (--  
459 SS\_lib\_type RF --min\_kmer\_cov 5 --normalize\_reads) yielding a total of 89,208  
460 assembled transcripts. The reference transcriptome is available at reefgenomics.org<sup>63</sup> at  
461 <http://spis.reefgenomics.org>.

## 462 **Gene model prediction**

463 All 89,208 transcripts from the reference transcriptome (see above) were mapped to the  
464 genome assembly and filtered by PASA release 20140417<sup>62</sup> to create a training set for  
465 AUGUSTUS version 3.0.2<sup>64,65</sup>. The training set was filtered using the following steps:  
466 (1) incomplete transcripts were removed, (2) transcripts with less than 3 exons were  
467 removed, (3) transcripts with ambiguous 5' or 3' untranslated regions (UTRs) were  
468 removed, (4) redundant transcripts were removed as indicated by BLASTP, (5)  
469 transcripts harboring repeat sequences were removed based on BLASTN against the  
470 repeat library generated by RepeatScout (see above). This yielded 2,844 transcripts and  
471 corresponding mapping information that were used to train AUGUSTUS. To improve  
472 prediction accuracy, a 'hints' file indicating the locations of matching transcripts was  
473 generated by mapping all 89,208 transcripts from the reference transcriptome to the  
474 genome assembly using BLAT and the AUGUSTUS script blat2hints.pl. Using the 'hints'  
475 file, AUGUSTUS was used for *ab initio* prediction of gene models from the genome  
476 assembly and PASA was used subsequently for comparison and completion of the gene  
477 models.

## 478 **Genome protein set completeness analysis**

479 Completeness of the *S. pistillata* genome was assessed using the CEGMA (Core  
480 Eukaryotic Genes Mapping Approach) pipeline<sup>66</sup> that is based on a set of core eukaryotic  
481 genes (CEGs) from six model organisms (*Homo sapiens*, *Drosophila melanogaster*,  
482 *Arabidopsis thaliana*, *Caenorhabditis elegans*, *Saccharomyces pombe*, and  
483 *Saccharomyces cerevisiae*). CEGMA searches for existence of 248 highly conserved  
484 genes in the genomic protein set using an approach based on BLASTP and subsequent  
485 validation using Hidden Markov Models generated for the core gene set in order to  
486 estimate the completeness of a given genomic gene set.

487

## 488 **Coral genomic protein set composition**

489 BLASTP searches of gene models from *S. pistillata* and *A. digitifera* were performed  
490 against two different databases. Using *S. pistillata* to illustrate the procedure, two  
491 databases were created: a ‘non-coral’ database, and a ‘with-coral’ database. The former  
492 consisted of *Aiptasia* gene models<sup>26</sup> and the NCBI ‘nr’ database (Nov. 2015 release); the  
493 latter included gene models from *A. digitifera*, in addition to the sequences from the ‘non-  
494 coral’ database. Species names contained within annotations for the best hits (e-value  $\leq$   
495  $10^{-5}$ ) were parsed and fed into a python script that obtained the full taxonomic hierarchy  
496 for the respective organisms via an API hosted by Encyclopedia of Life  
497 (<http://eol.org/api>)<sup>67</sup>. Based on the resulting hierarchies, best hits were grouped based on  
498 their respective genus. Chord diagrams were drawn using Circos<sup>68</sup>. For visual clarity,  
499 only the six most frequent genera were shown and all others were collapsed into “Others”.

## 500 **Protein set annotation**

501 The final set of predicted proteins derived their annotations from UniProt (i.e., SwissProt  
502 and TrEMBL) or the NCBI ‘nr’ databases (Table S1, Supplementary Dataset S8), similar  
503 to the pipeline described previously<sup>26,59</sup>. Briefly, genomic protein models were subjected  
504 to a BLASTP search against SwissProt and TrEMBL databases (June 2014 release). GO  
505 terms associated with SwissProt and TrEMBL hits were obtained from UniProt-GOA  
506 (July 2014 release)<sup>69</sup>. If the best-scoring hit of the BLASTP search did not yield any GO  
507 annotation, further hits (up to 20 hits, e-value  $\leq 10^{-5}$ ) were considered, and the best-  
508 scoring hit with available GO annotation was used. If none of the SwissProt hits had GO  
509 terms associated with them, the TrEMBL hits were processed similarly. Using this  
510 procedure, 21,446 genes (83.2% of the 25,769 gene models) were annotated and had at  
511 least one GO term associated with them (17,506 proteins had GO annotations via Swiss-  
512 Prot, while the remaining 3,940 were from TrEMBL) (Table S1). A majority of the  
513 annotations were based on strong alignments to existing sequences within the SwissProt  
514 and TrEMBL databases: 19,060 genes had e-values  $\leq 10^{-10}$ , 15,637 of these had e-values  
515  $\leq 10^{-20}$ . Proteins that had no matches to either database were subjected to an additional  
516 search against the NCBI ‘nr’ database (e-value  $\leq 10^{-5}$ ). An additional 1,466 proteins were  
517 annotated this way. A small fraction of proteins (2,857, 11.1%) had no hits to any of the  
518 three databases. A similar procedure was performed for the *A. digitifera* gene models to  
519 eliminate potential biases stemming from the use of different annotation pipelines  
520 (Supplementary Dataset S9).

## 521 **Ortholog identification, category assignment, and GO enrichment analyses**

522 Orthologs between *S. pistillata* (n = 25,679 genes) and the *A. digitifera* V1 gene set (n =  
523 23,523 genes) ([http://marinegenomics.oist.jp/genomes/downloads?project\\_id=3](http://marinegenomics.oist.jp/genomes/downloads?project_id=3)) were  
524 identified using Inparanoid v4.1<sup>70</sup> and assigned to four categories according to their



525 evolutionary relationships: (i) one-to-one orthologs, (ii) many-to-one and many-to-many  
526 orthologs, (iii) proteins without easily discernible orthologous relationships, and (iv)  
527 species-specific proteins without homologs in other species. Gene Ontology (GO)  
528 enrichment analyses of orthologs from all categories were conducted by testing  
529 annotations from genes belong to a given category relative to annotations from all genes  
530 of that species. For instance, in order to investigate enrichment of biological functions of  
531 the one-to-one orthologs, GO terms within the list of 6,302 *S. pistillata* genes were tested  
532 for enrichment relative to all *S. pistillata* genes with at least one annotated GO term  
533 (21,446 genes). Similarly, the 6,302 *A. digitifera* genes were tested against *A. digitifera*  
534 genes with at least one annotated GO term (18,544 genes). GO enrichment analyses were  
535 conducted using topGO (v2.24.0)<sup>71</sup> with the “weight01” settings. The threshold for  
536 significance was  $p < 0.05$ . The  $p$  values were not corrected for multiple testing as non-  
537 independent tests were carried out on each GO term.

### 538 **Phylogenetic trees**

539 Sequences from ortholog groups of interest were first aligned using MUSCLE<sup>72</sup>, and  
540 aligned sequences were then trimmed with trimAl v1.4.1<sup>73</sup> with the “-automated1” flag.  
541 The alignments were subsequently constructed using RAxML v8.2.9<sup>74</sup> with 1,000  
542 bootstraps (-m PROTGAMMAJTT -x 12345 -p 12345 -N 1000 -f a). Trees were viewed  
543 and exported to a graphical format using FigTree v1.4.2  
544 (<http://tree.bio.ed.ac.uk/software/figtree/>).

545

546 **References**

- 547 1 Porter, J. W. & Tougas, J. I. in *Encyclopedia of Biodiversity* (ed Simon Asher  
548 Levin) 73-95 (Elsevier, 2001).
- 549 2 Wilkinson, C. e. Status of Coral Reefs of the World: 2008. *Global Coral Reef*  
550 *Monitoring Network and Reef and Rainforest Research Center, Townsville,*  
551 *Australia* (2008).
- 552 3 Hughes, T. P. *et al.* Climate change, human impacts, and the resilience of coral  
553 reefs. *Science* **301**, 929-933 (2003).
- 554 4 Hoegh-Guldberg, O. *et al.* Coral reefs under rapid climate change and ocean  
555 acidification. *Science* **318**, 1737-1742 (2007).
- 556 5 Maynard, J. *et al.* Projections of climate conditions that increase coral disease  
557 susceptibility and pathogen abundance and virulence. *Nature Clim. Change* **5**,  
558 688-694 (2015).
- 559 6 Carpenter, K. E. *et al.* One-third of reef-building corals face elevated extinction  
560 risk from climate change and local impacts. *Science* **321**, 560-563 (2008).
- 561 7 Forest, R., Victor, S., Farooq, A. & Nancy, K. Diversity and distribution of coral-  
562 associated bacteria. *Marine Ecology Progress Series* **243**, 1-10 (2002).
- 563 8 Knowlton, N. & Rohwer, F. Multispecies Microbial Mutualisms on Coral Reefs:  
564 The Host as a Habitat. *The American Naturalist* **162**, S51-S62 (2003).
- 565 9 Voolstra, C. *et al.* The ReFuGe 2020 Consortium—using “omics” approaches to  
566 explore the adaptability and resilience of coral holobionts to environmental  
567 change. *Frontiers in Marine Science* **2**, 68 (2015).
- 568 10 Daniels, C. *et al.* Metatranscriptome analysis of the reef-building coral *Orbicella*  
569 *faveolata* indicates holobiont response to coral disease. *Frontiers in Marine*  
570 *Science* **2** (2015).
- 571 11 Theis, K. R. *et al.* Getting the hologenome concept right: An eco-evolutionary  
572 framework for hosts and their microbiomes. *bioRxiv* (2016).
- 573 12 McFall-Ngai, M. *et al.* Animals in a bacterial world, a new imperative for the life  
574 sciences. *Proceedings of the National Academy of Sciences* **110**, 3229-3236  
575 (2013).
- 576 13 Rosenberg, E., Koren, O., Reshef, L., Efrony, R. & Zilber-Rosenberg, I. The role  
577 of microorganisms in coral health, disease and evolution. *Nature Reviews:*  
578 *Microbiology* **5**, 355-362 (2007).
- 579 14 Bay, R. A. & Palumbi, S. R. Rapid Acclimation Ability Mediated by  
580 Transcriptome Changes in Reef-Building Corals. *Genome biology and evolution* **7**,  
581 1602-1612 (2015).
- 582 15 Seneca, F. O. & Palumbi, S. R. The role of transcriptome resilience in resistance  
583 of corals to bleaching. *Molecular ecology* **24**, 1467-1484 (2015).
- 584 16 Barshis, D. J. *et al.* Genomic basis for coral resilience to climate change.  
585 *Proceedings of the National Academy of Sciences of the United States of America*  
586 **110**, 1387-1392 (2013).
- 587 17 Kenkel, C. D., Meyer, E. & Matz, M. V. Gene expression under chronic heat  
588 stress in populations of the mustard hill coral (*Porites astreoides*) from different  
589 thermal environments. *Molecular ecology* **22**, 4322-4334 (2013).

- 590 18 Hume, B. C. C. *et al.* Ancestral genetic diversity associated with the rapid spread  
591 of stress-tolerant coral symbionts in response to Holocene climate change.  
592 *Proceedings of the National Academy of Sciences* **113**, 4416-4421 (2016).
- 593 19 Ziegler, M. *et al.* Coral microbial community dynamics in response to  
594 anthropogenic impacts near a major city in the central Red Sea. *Marine pollution*  
595 *bulletin* **105**, 629-640 (2016).
- 596 20 Ziegler, M. *et al.* Biogeography and molecular diversity of coral symbionts in the  
597 genus *Symbiodinium* around the Arabian Peninsula. *Journal of Biogeography*  
598 **Accepted** (2016).
- 599 21 Ziegler, M., Seneca, F. O., Yum, L. K., Palumbi, S. R. & Voolstra, C. R. Bacterial  
600 community dynamics are linked to patterns of coral heat tolerance. *Nature*  
601 *Communications* **Accepted** (2016).
- 602 22 Bhattacharya, D. *et al.* Comparative genomics explains the evolutionary success  
603 of reef-forming corals. *eLife* **5**, e13288 (2016).
- 604 23 Shinzato, C. *et al.* Using the *Acropora digitifera* genome to understand coral  
605 responses to environmental change. *Nature* **476**, 320-323 (2011).
- 606 24 Putnam, N. H. *et al.* Sea anemone genome reveals ancestral eumetazoan gene  
607 repertoire and genomic organization. *Science* **317**, 86-94 (2007).
- 608 25 Chapman, J. A. *et al.* The dynamic genome of *Hydra*. *Nature* **464**, 592-596 (2010).
- 609 26 Baumgarten, S. *et al.* The genome of *Aiptasia*, a sea anemone model for coral  
610 symbiosis. *Proceedings of the National Academy of Sciences* **112**, 11893-11898  
611 (2015).
- 612 27 Park, E. *et al.* Estimation of divergence times in cnidarian evolution based on  
613 mitochondrial protein-coding genes and the fossil record. *Molecular*  
614 *Phylogenetics and Evolution* **62**, 329-345 (2012).
- 615 28 Simpson, C., Kiessling, W., Mewis, H., Baron-Szabo, R. C. & Müller, J.  
616 Evolutionary Diversification of Reef Corals: A comparison of the molecular and  
617 fossil records. *Evolution* **65**, 3274-3284 (2011).
- 618 29 Khalturin, K., Hemmrich, G., Fraune, S., Augustin, R. & Bosch, T. C. G. More  
619 than just orphans: are taxonomically-restricted genes important in evolution?  
620 *Trends in Genetics* **25**, 404-413 (2009).
- 621 30 Zdobnov, E. M. *et al.* Genome and Proteome Analysis of *Anopheles gambiae* and  
622 *Drosophila melanogaster*. *Science* **298**, 149-159 (2002).
- 623 31 Parra, G., Bradnam, K. & Korf, I. CEGMA: a pipeline to accurately annotate core  
624 genes in eukaryotic genomes. *Bioinformatics* **23**, 1061-1067 (2007).
- 625 32 Gaunt, M. W. & Miles, M. A. An Insect Molecular Clock Dates the Origin of the  
626 Insects and Accords with Palaeontological and Biogeographic Landmarks.  
627 *Molecular Biology and Evolution* **19**, 748-761 (2002).
- 628 33 Voolstra, C. R. *et al.* Rapid Evolution of Coral Proteins Responsible for  
629 Interaction with the Environment. *PLoS ONE* **6**, e20392 (2011).
- 630 34 Aparicio, S. *et al.* Whole-Genome Shotgun Assembly and Analysis of the  
631 Genome of *Fugu rubripes*. *Science* **297**, 1301-1310 (2002).
- 632 35 Rädcker, N., Pogoreutz, C., Voolstra, C. R., Wiedenmann, J. & Wild, C.  
633 Nitrogen cycling in corals: the key to understanding holobiont functioning?  
634 *Trends in Microbiology* **23**, 490-497 (2015).

- 635 36 Ganot, P. *et al.* Structural Molecular Components of Septate Junctions in  
636 Cnidarians Point to the Origin of Epithelial Junctions in Eukaryotes. *Molecular*  
637 *Biology and Evolution* **32**, 44-62 (2015).
- 638 37 Kitahara, M. V., Cairns, S. D., Stolarski, J., Blair, D. & Miller, D. J. A  
639 Comprehensive Phylogenetic Analysis of the Scleractinia (Cnidaria, Anthozoa)  
640 Based on Mitochondrial CO1 Sequence Data. *PLoS ONE* **5**, e11490 (2010).
- 641 38 Shearer, T. L., Van Oppen, M. J., Romano, S. L. & Worheide, G. Slow  
642 mitochondrial DNA sequence evolution in the Anthozoa (Cnidaria). *Molecular*  
643 *ecology* **11**, 2475-2487 (2002).
- 644 39 Kitahara, M. V. *et al.* The “Naked Coral” Hypothesis Revisited – Evidence for  
645 and Against Scleractinian Monophyly. *PLoS ONE* **9**, e94774 (2014).
- 646 40 Fukami, H. *et al.* Mitochondrial and Nuclear Genes Suggest that Stony Corals Are  
647 Monophyletic but Most Families of Stony Corals Are Not (Order Scleractinia,  
648 Class Anthozoa, Phylum Cnidaria). *PLoS ONE* **3**, e3222 (2008).
- 649 41 Wells, J. in *Treatise on Invertebrate Paleontology. Part F. Coelenterata* (ed RC  
650 Moore) 328-440 (Geological Society of America & University of Kansas Press,  
651 1956).
- 652 42 Hamada, M. *et al.* The Complex NOD-Like Receptor Repertoire of the Coral  
653 *Acropora digitifera* Includes Novel Domain Combinations. *Molecular Biology*  
654 *and Evolution* **30**, 167-176 (2013).
- 655 43 Poole, A. Z. & Weis, V. M. TIR-domain-containing protein repertoire of nine  
656 anthozoan species reveals coral-specific expansions and uncharacterized proteins.  
657 *Developmental and comparative immunology* **46**, 480-488 (2014).
- 658 44 Zoccola, D. *et al.* Bicarbonate transporters in corals point towards a key step in  
659 the evolution of cnidarian calcification. *Scientific Reports* **5**, 9983 (2015).
- 660 45 Tambutte *et al.* A compartmental approach to the mechanism of calcification in  
661 hermatypic corals. *The Journal of experimental biology* **199**, 1029-1041 (1996).
- 662 46 Keshavmurthy, S. *et al.* DNA barcoding reveals the coral “laboratory-rat”,  
663 *Stylophora pistillata* encompasses multiple identities. *Scientific Reports* **3**, 1520  
664 (2013).
- 665 47 Bolger, A. M., Lohse, M. & Usadel, B. Trimmomatic: a flexible trimmer for  
666 Illumina sequence data. *Bioinformatics* **30**, 2114-2120 (2014).
- 667 48 Xu, H. *et al.* FastUniq: A Fast De Novo Duplicates Removal Tool for Paired  
668 Short Reads. *PLoS ONE* **7**, e52249 (2012).
- 669 49 Crusoe, M. R. *et al.* The khmer software package: enabling efficient nucleotide  
670 sequence analysis. *F1000Research* **4**, 900 (2015).
- 671 50 Gnerre, S. *et al.* High-quality draft assemblies of mammalian genomes from  
672 massively parallel sequence data. *Proceedings of the National Academy of*  
673 *Sciences* **108**, 1513-1518 (2011).
- 674 51 Xue, W. *et al.* L\_RNA\_scaffolder: scaffolding genomes with transcripts. *BMC*  
675 *Genomics* **14**, 604 (2013).
- 676 52 Boetzer, M., Henkel, C. V., Jansen, H. J., Butler, D. & Pirovano, W. Scaffolding  
677 pre-assembled contigs using SSPACE. *Bioinformatics* **27**, 578-579 (2011).
- 678 53 Boetzer, M. & Pirovano, W. Toward almost closed genomes with GapFiller.  
679 *Genome Biology* **13**, 1-9 (2012).

- 680 54 Bradnam, K. R. *et al.* Assemblathon 2: evaluating de novo methods of genome  
681 assembly in three vertebrate species. *GigaScience* **2**, 10-10 (2013).
- 682 55 Shoguchi, E. *et al.* Draft assembly of the Symbiodinium minutum nuclear genome  
683 reveals dinoflagellate gene structure. *Current biology : CB* **23**, 1399-1408 (2013).
- 684 56 Aranda, M. *et al.* Genome analysis of coral dinoflagellate symbionts highlights  
685 evolutionary adaptations to a symbiotic lifestyle. *Scientific Reports* **Accepted**  
686 (2016).
- 687 57 Price, A. L., Jones, N. C. & Pevzner, P. A. De novo identification of repeat  
688 families in large genomes. *Bioinformatics* **21**, i351-i358 (2005).
- 689 58 Smit, A., Hubley, R. & Green, P. *RepeatMasker Open-4.0.*,  
690 <<http://www.repeatmasker.org>> (2013-2015).
- 691 59 Liew, Y. J. *et al.* Identification of microRNAs in the coral *Stylophora pistillata*.  
692 *Plos One* **9** (2014).
- 693 60 Langmead, B. & Salzberg, S. L. Fast gapped-read alignment with Bowtie 2.  
694 *Nature methods* **9**, 357-359 (2012).
- 695 61 Schmieder, R. & Edwards, R. Quality control and preprocessing of metagenomic  
696 datasets. *Bioinformatics* **27**, 863-864 (2011).
- 697 62 Haas, B. J. *et al.* De novo transcript sequence reconstruction from RNA-Seq:  
698 reference generation and analysis with Trinity. *Nature protocols* **8**,  
699 10.1038/nprot.2013.1084 (2013).
- 700 63 Liew Y.J., Aranda M. & C.R., V. reefgenomics.org—a repository for marine  
701 genomics data. *Database* **Accepted** (2016).
- 702 64 Stanke, M. *et al.* AUGUSTUS: ab initio prediction of alternative transcripts.  
703 *Nucleic acids research* **34**, W435-439 (2006).
- 704 65 Stanke, M. & Waack, S. Gene prediction with a hidden Markov model and a new  
705 intron submodel. *Bioinformatics* **19 Suppl 2**, ii215-225 (2003).
- 706 66 Parra, G., Bradnam, K., Ning, Z., Keane, T. & Korf, I. Assessing the gene space  
707 in draft genomes. *Nucleic acids research* **37**, 289-297 (2009).
- 708 67 Parr, C. S. *et al.* The Encyclopedia of Life v2: Providing Global Access to  
709 Knowledge About Life on Earth. *Biodiversity Data Journal*, e1079 (2014).
- 710 68 Krzywinski, M. *et al.* Circos: An information aesthetic for comparative genomics.  
711 *Genome Research* **19**, 1639-1645 (2009).
- 712 69 Dimmer, E. *et al.* The UniProt-GO Annotation database in 2011. *Nucleic acids*  
713 *research* **40**, D565 - D570 (2012).
- 714 70 Sonnhammer, E. L. L. & Östlund, G. InParanoid 8: orthology analysis between  
715 273 proteomes, mostly eukaryotic. *Nucleic acids research* (2014).
- 716 71 Alexa, A. & Rahnenfuhrer, J. topGO: enrichment analysis for gene ontology. *R*  
717 *package version 2.8* (2010).
- 718 72 Edgar, R. C. MUSCLE: multiple sequence alignment with high accuracy and high  
719 throughput. *Nucleic acids research* **32**, 1792-1797 (2004).
- 720 73 Capella-Gutierrez, S., Silla-Martinez, J. M. & Gabaldon, T. trimAl: a tool for  
721 automated alignment trimming in large-scale phylogenetic analyses.  
722 *Bioinformatics* **25**, 1972-1973 (2009).
- 723 74 Stamatakis, A. RAxML version 8: a tool for phylogenetic analysis and post-  
724 analysis of large phylogenies. *Bioinformatics* **30**, 1312-1313 (2014).

725

726 **Acknowledgements**

727 We would like to thank the Bioscience Core Lab at KAUST for sequencing. Further, we  
728 would like to thank Adrian Carr and Gos Micklem for support with an initial genome  
729 assembly. Research reported in this publication was supported by King Abdullah  
730 University of Science and Technology (KAUST).

731 **Author contributions**

732 CRV, MA, YL, YJL, SB designed and conceived the study; DZ, ST, DA generated data;  
733 YJL, SB, YL, MA, CRV analyzed data; MA, DZ, ST, DA, CRV contributed  
734 reagents/tools/materials; CRV wrote the manuscript with contributions from MA, YJL,  
735 YL, and SB; all authors read and approved the final manuscript.

736 **Additional Information**

737 **Accession codes.** The genome assembly, gene models, and protein models described in  
738 this study are available for download at <http://spis.reefgenomics.org/download>. A  
739 JBrowse genome browser is available at <http://spis.reefgenomics.org/jbrowse>. A BLAST  
740 server for the *Stylophora pistillata* genome is available at  
741 <http://spis.reefgenomics.org/blast/>. Raw sequence data reported are deposited at NCBI  
742 under the accession number PRJNA281535  
743 (<https://www.ncbi.nlm.nih.gov/bioproject/PRJNA281535/>).

744 **Competing financial interests.** The authors declare that they have no competing  
745 interests.

746

747 **Figure legends**

748 **Figure 1. Chord diagrams showing genomic gene compositions of *S. pistillata* and *A.***  
749 ***digitifera*.** For both diagrams, best matches to both corals and top 6 genera are shown.  
750 (A) Both coral genomes appear similar in composition when queried against non-coral  
751 sequences. As expected, most of the matches were to other cnidarian species, such as  
752 *Aiptasia* or *Nematostella*. (B) If coral genomic gene sets are allowed to match against  
753 each other, many more *A. digitifera* genes match homologs in *S. pistillata* homologs than  
754 *vice versa*. As a consequence of the asymmetrical matching, the number of *A. digitifera*  
755 matches to other genera is vastly reduced.

756

757 **Figure 2. Classification of genomic protein sets of *S. pistillata* and *A. digitifera***  
758 **according to evolutionary relationship.** 25,769 *S. pistillata* proteins were compared to  
759 23,523 *A. digitifera* proteins and assigned to four categories: (i) one-to-one orthologs  
760 (blue), (ii) many-to-one and many-to-many orthologs (green), (iii) proteins without easily  
761 discernible orthologous relationships (teal), and (iv) species-specific proteins without  
762 homologs in other species (dark blue).

763

764 **Figure 3. Gene expansion of orthologs in *S. pistillata* and *A. digitifera*.** (A) Ortholog  
765 expansion displaying a many-to-many relationship for a NOD-like receptor family  
766 members, in which *A. digitifera* harbors 52 proteins in comparison to *S. pistillata* that  
767 harbors only 5 proteins. (B) Ortholog expansion displaying a many-to-one relationship of  
768 a TRAF (TNF receptor-associated factor 3) homolog with expansion in *S. pistillata*. (C)  
769 Ortholog expansion displaying a many-to-one relationship of a member of the NOD-like  
770 receptor family member (NLRC3) with a particular pronounced expansion in *A. digitifera*  
771 (55 genes) and only one corresponding counterpart in *S. pistillata*.

772

773 **Table 1. Assembly statistics for the genomes of *S. pistillata* and *A. digitifera*.**

|                   | <i>Stylophora<br/>pistillata</i>               | <i>Acropora<br/>digitifera</i> |                 |
|-------------------|------------------------------------------------|--------------------------------|-----------------|
| <b>Genome</b>     | Genome file used                               | v1.0                           | v1.0 (Jul 2011) |
|                   | Estimated genome size (Mb)                     | 434                            | 420             |
|                   | Total scaffold length (bp)                     | 400,108,361                    | 419,317,576     |
|                   | Scaffold N50 (bp)                              | 457,453                        | 191,489         |
|                   | Total contig length (bp)                       | 358,078,850                    | 364,965,673*    |
|                   | Contig N50 (bp)                                | 24,388                         | 10,700*         |
|                   | GC content, N excluded (%)                     | 38.5                           | 39.0            |
| <b>Genes</b>      | Number of genes (longest transcript per locus) | 25,769                         | 23,523          |
|                   | Mean gene length (bp)                          | 8,432                          | N/A             |
|                   | Gene model EST support (%)                     | 82.1                           | 78*             |
| <b>Exons</b>      | Mean coding region length (bp)                 | 2,086                          | 1,707*          |
|                   | Number of exons per gene                       | 7.9                            | 7.0*            |
|                   | Mean length (bp)                               | 266                            | 230             |
|                   | Total length (Mb)                              | 53.8                           | 40.2            |
| <b>Introns</b>    | Genes with introns (%)                         | 96.6                           | N/A             |
|                   | Mean length (bp)                               | 918.3                          | N/A             |
|                   | Total length (Mb)                              | 162.1                          | N/A             |
| <b>Intergenic</b> | Average length (bp)                            | 6,333                          | N/A             |

\*: from Shinzato et al., 2011.

Some statistics were not available as the *A. digitifera* v1.0 gff3 file was not made public.

774



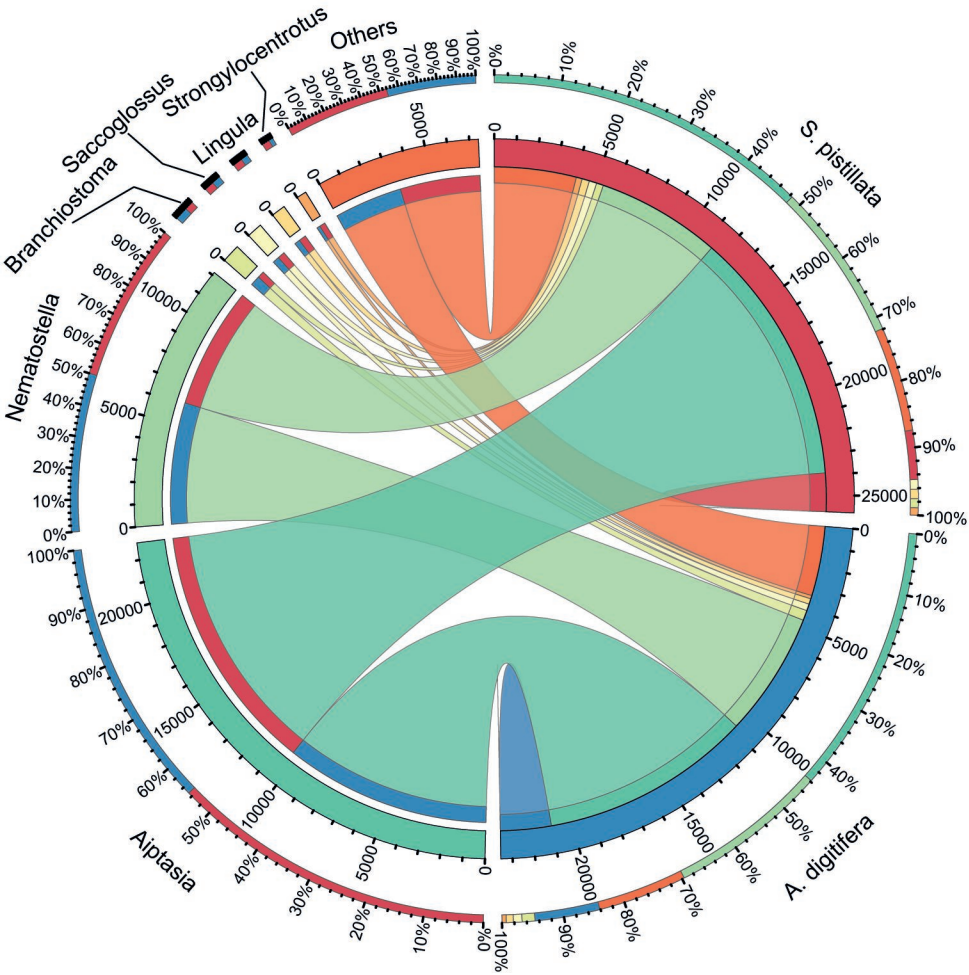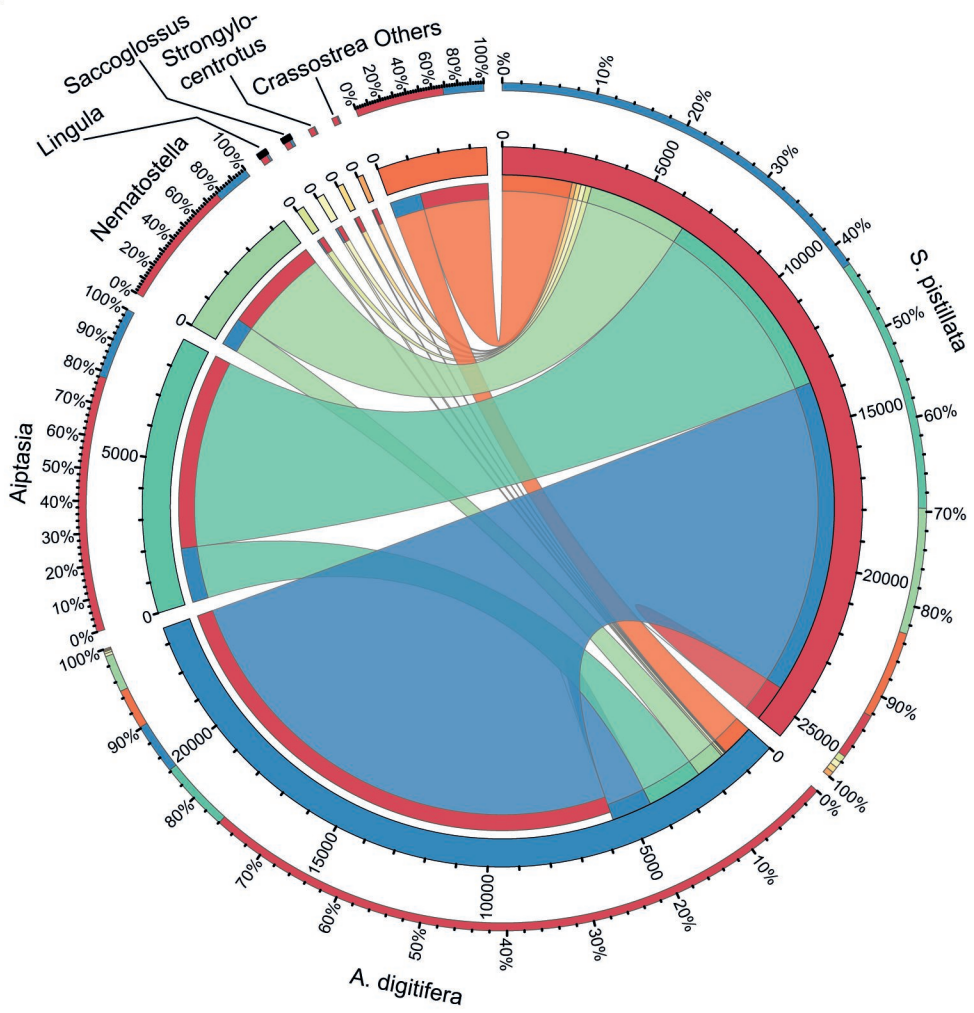

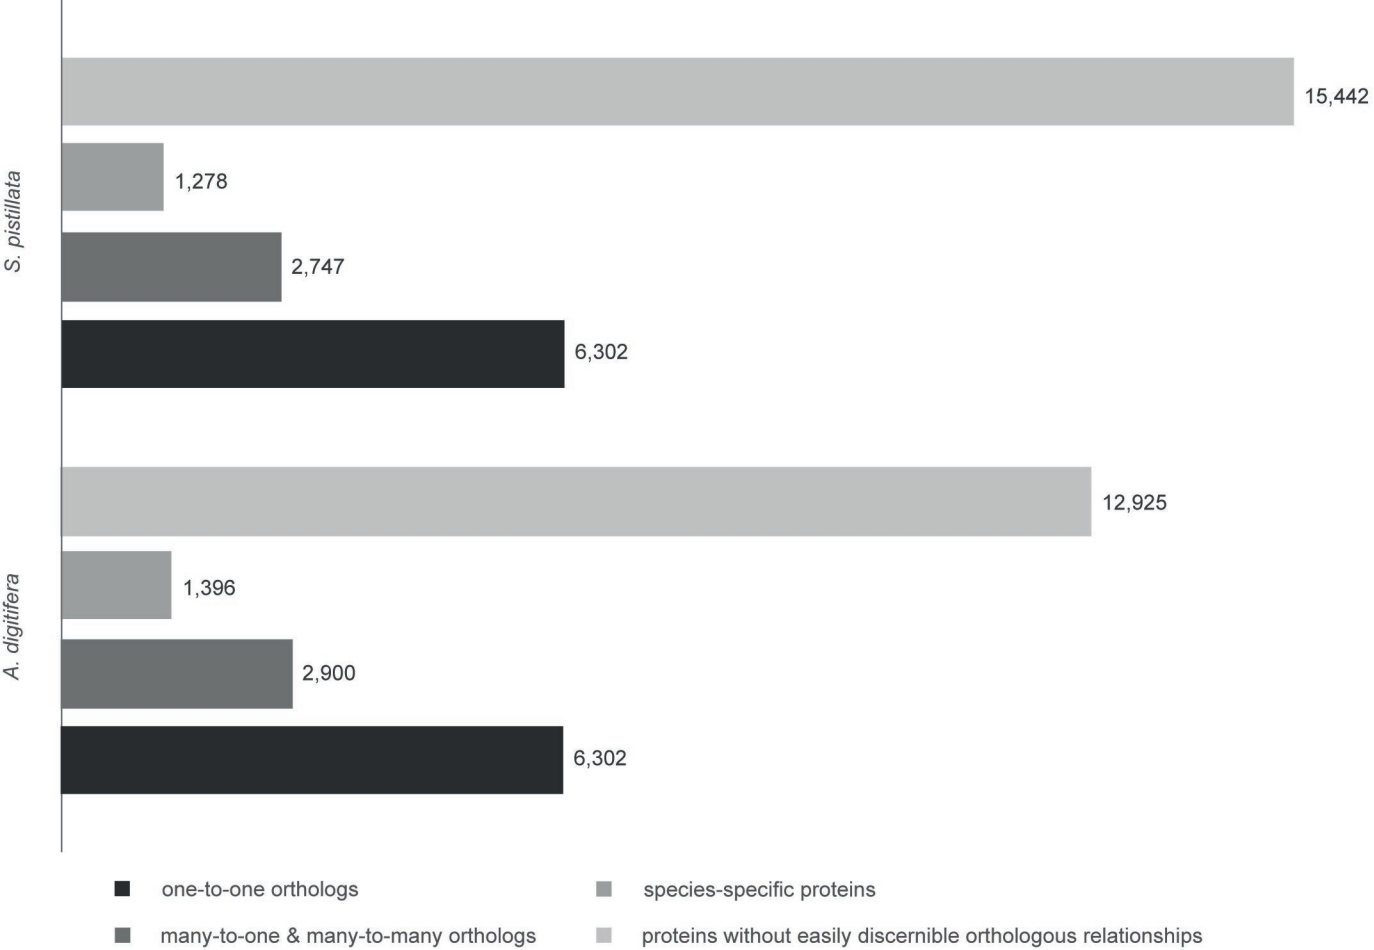

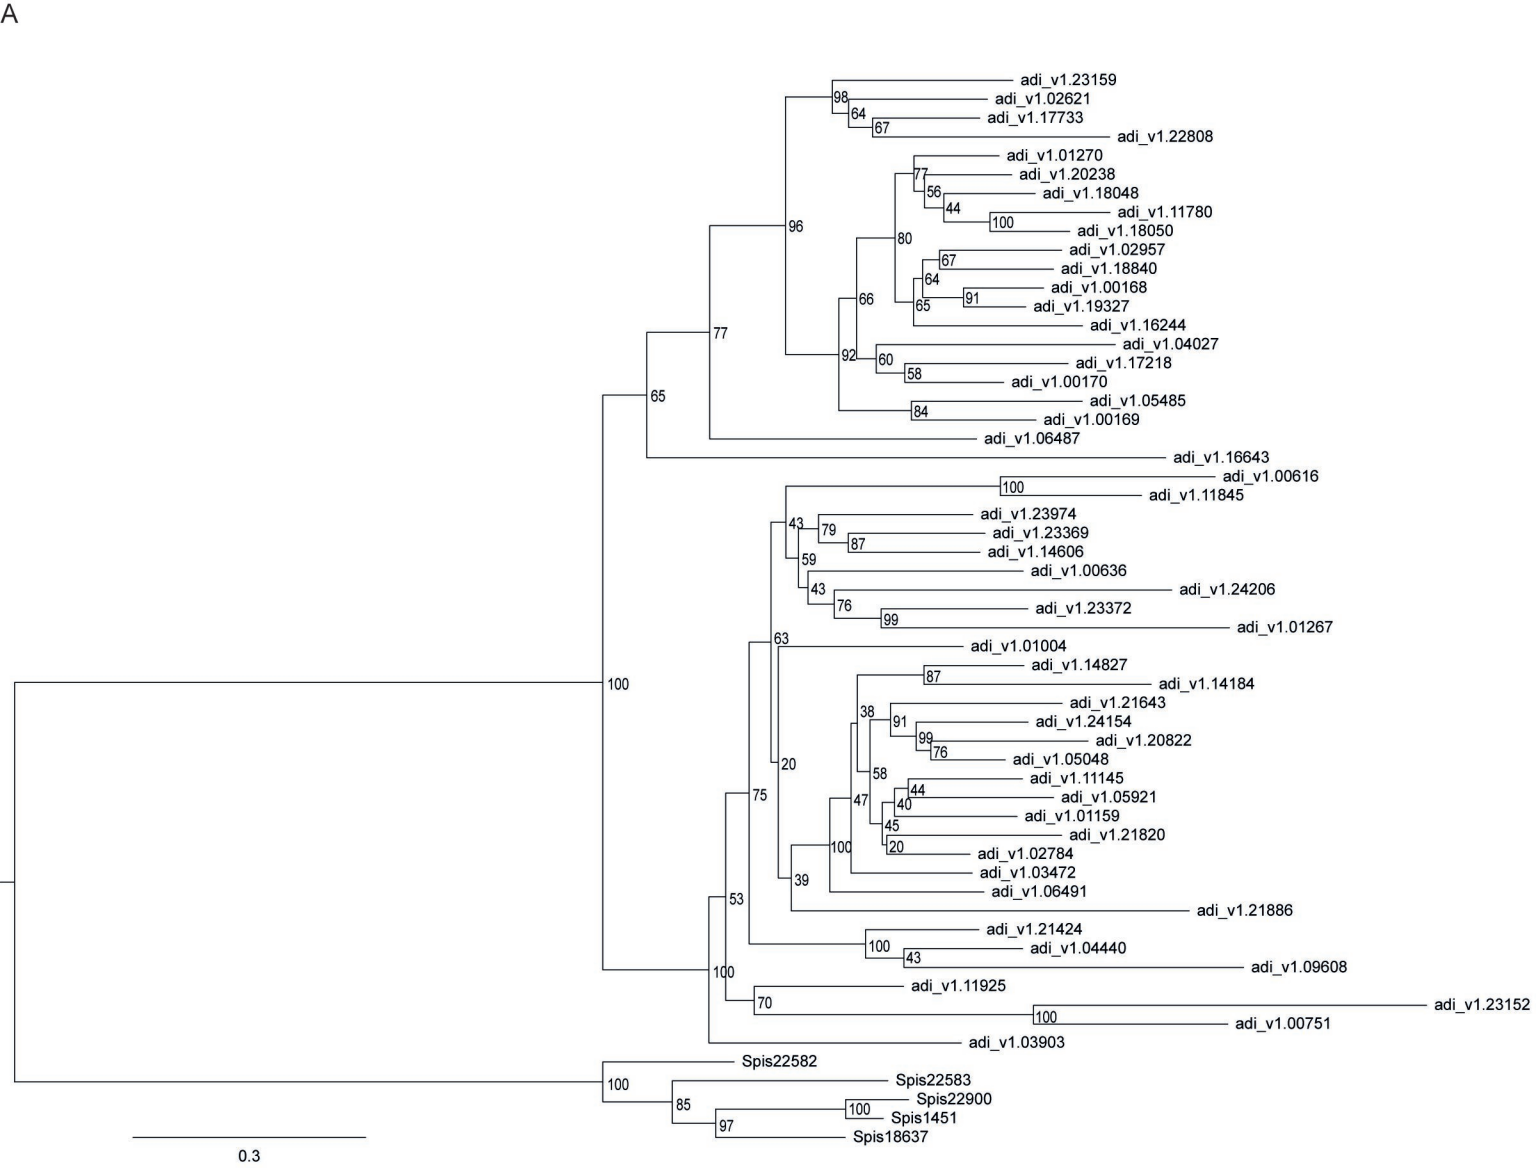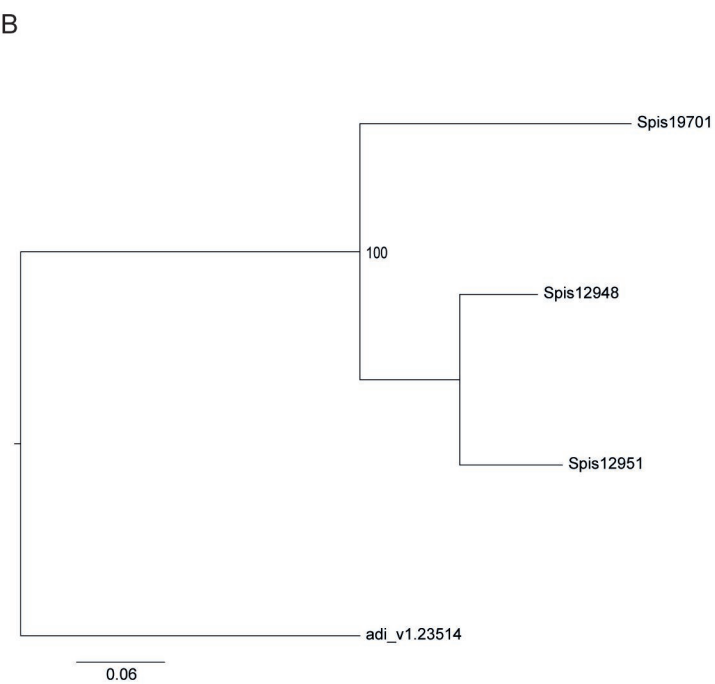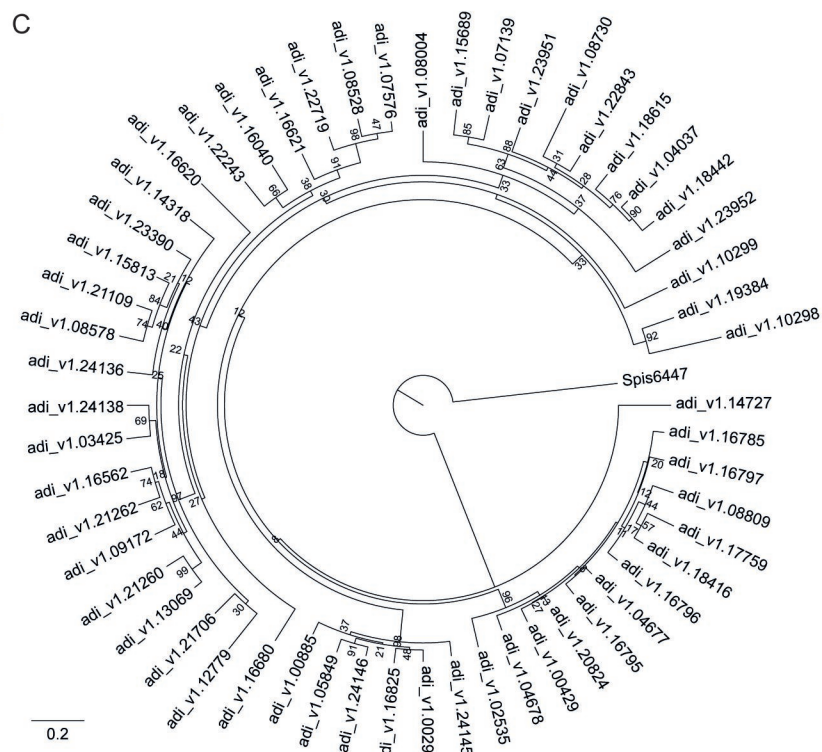

Source: https://www.biorxiv.org/content/10.1101/197830v1.full.pdf
